# Supplementary material
Source: MDPI journal article supplement (https://www.mdpi.com/2079-6412/11/1/100)
Supplement: s1 [file s1]

# Supplementary Materials: Electrodeposition and Characterization of Lanthanide Elements on Carbon Sheets

Min Hee Joo <sup>1,2</sup>, So Jeong Park <sup>1</sup>, Sung-Min Hong <sup>1,2</sup>, Choong Kyun Rhee <sup>1</sup>, Dongsoo Kim <sup>3,4,\*</sup> and Youngku Sohn <sup>1,2,\*</sup>

<sup>1</sup> Department of Chemistry, Chungnam National University, Daejeon 34134, Korea; wnalsgml4803@naver.com (M.H.J.); jsjs5921@naver.com (S.J.P.); qwqe212@naver.com (S.-M.H.); ckrhee@cnu.ac.kr (C.K.R.)

<sup>2</sup> Department of Chemical Engineering and Applied Chemistry, Chungnam National University, Daejeon 34134, Korea

<sup>3</sup> Convergence Research Center for Development of Mineral Resources, Korea Institute of Geoscience and Mineral Resources, 124, Gwahakro, Daejeon 34132, Korea

<sup>4</sup> Powder and Ceramics Division, Korea Institute of Materials Science, 797, Changwondaero, Seongsangu, Changwon, Gyeongnam 51508, Korea

\* Correspondence: dskim69@kigam.re.kr (D.K.); youngkusohn@cnu.ac.kr (Y.S.); Tel.: +82-42-821-6548 (Y.S.)

**Citation:** Joo, M.H.; Park, S.J.; Hong, S.-M.; Rhee, C.K.; Kim, D.; Sohn, Y. Electrodeposition and Characterization of Lanthanide Elements on Carbon Sheets. *Coatings* **2021**, *11*, 100. <https://doi.org/10.3390/coatings11010100>

Received: 27 December 2020

Accepted: 13 January 2021

Published: 18 January 2021

**Publisher's Note:** MDPI stays neutral with regard to jurisdictional claims in published maps and institutional affiliations.

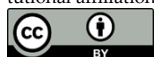

**Copyright:** © 2021 by the authors. Submitted for possible open access publication under the terms and conditions of the Creative Commons Attribution (CC BY) license (<http://creativecommons.org/licenses/by/4.0/>).

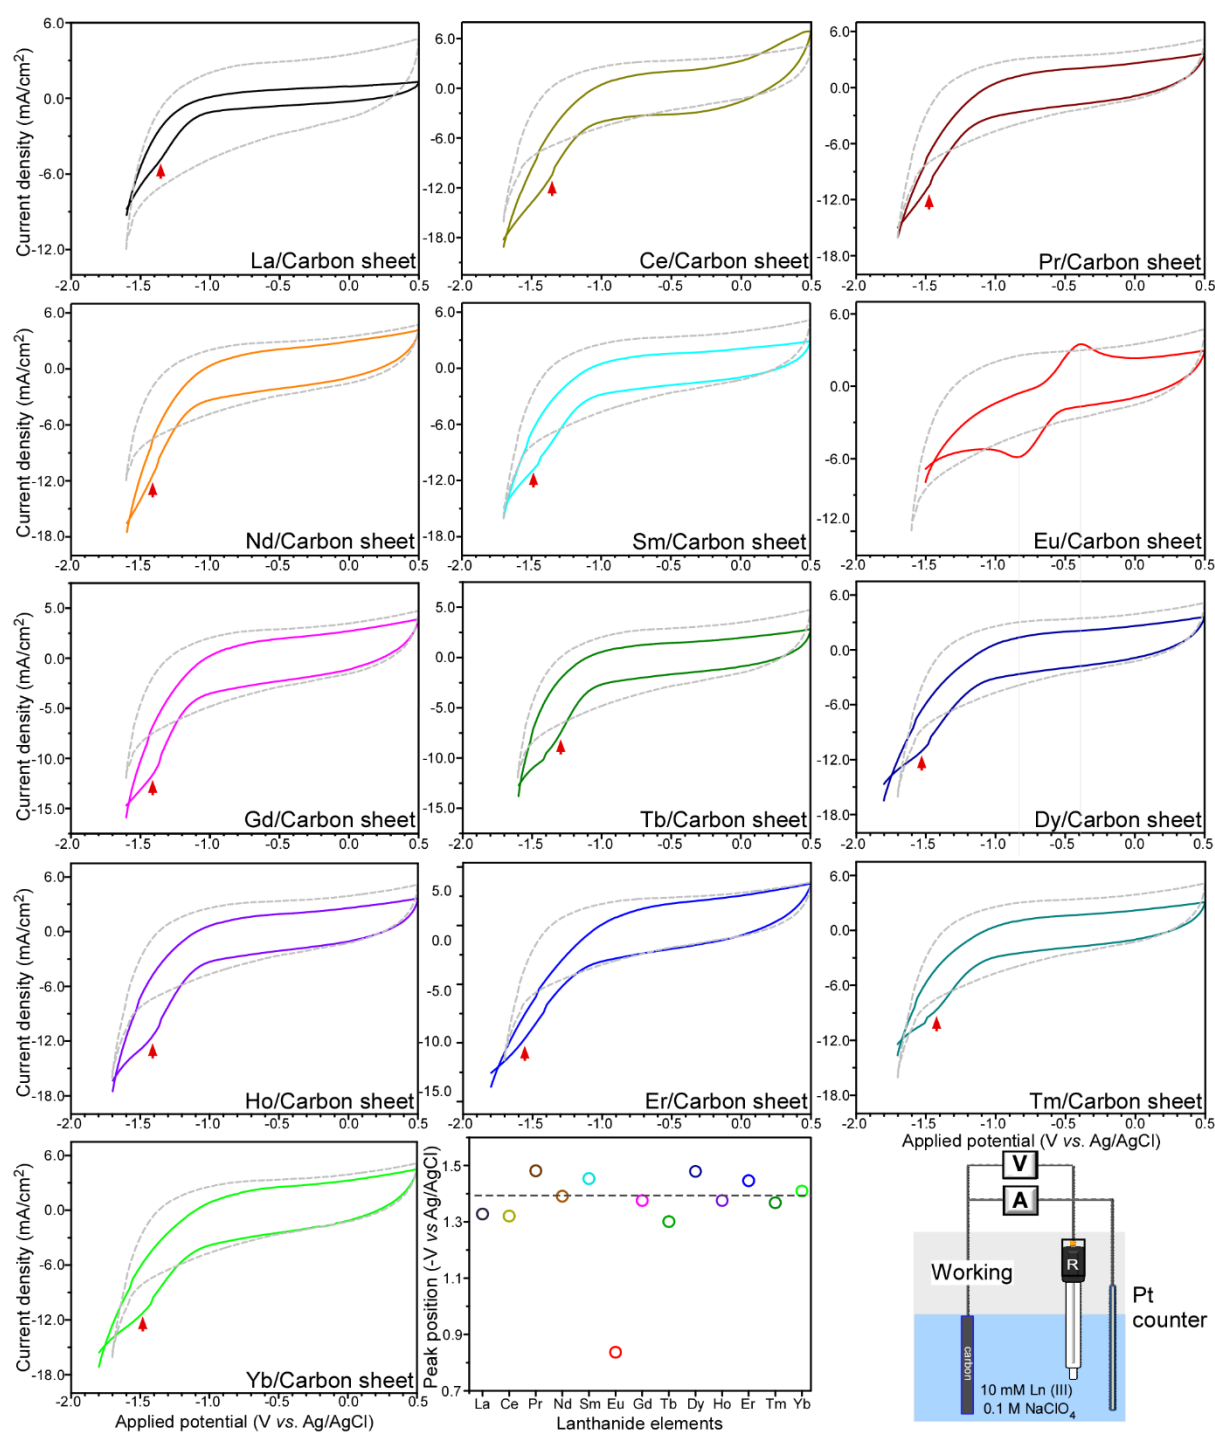

**Figure S1.** Cyclic voltammetry profiles for 10 mM Ln(III) ions in 0.1 M NaClO<sub>4</sub> electrolyte on carbon sheets at a scan rate of 200 mV·sec<sup>-1</sup> and a schematic of a three-electrode system. Newly appeared curvatures are indicated by a red arrow.
